# Supplementary material for: Improved Performance of D-Psicose 3-Epimerase by Immobilisation on Amino-Epoxide Support with Intense Multipoint Attachment
Source: MDPI journal article supplement (doi:10.3390/foods10040831), 2021-04-11
Supplement: s1 [file s1]

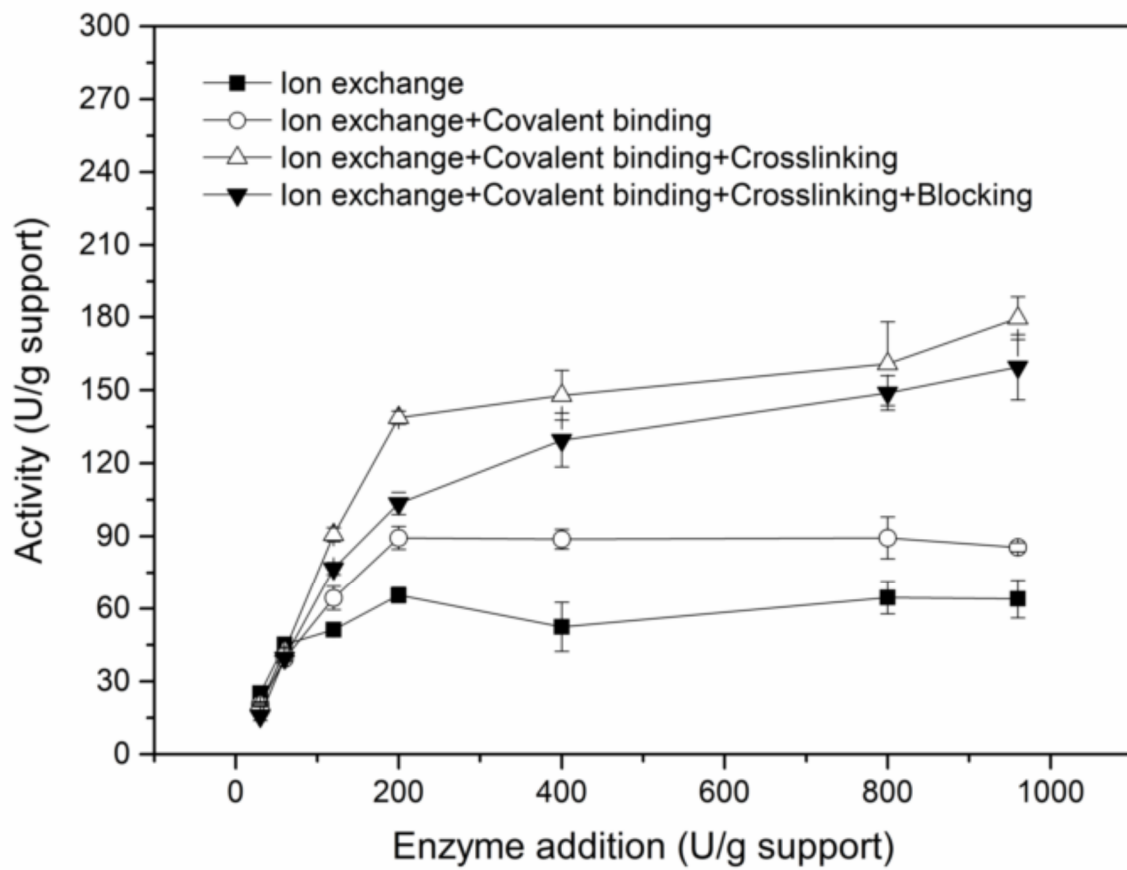

Figure S1. Effect of enzyme addition on activities of immobilized DPEase.
